# Supplementary material
Source: Royal Society of Chemistry journal article supplement (doi:10.1039/d6nj01171c)
Supplement: d6nj01171c1.pdf [file d6nj01171c1.pdf]

## Supplementary Information

### Density Functional Theory-Assisted Electrochemical Sensing of Caffeic Acid Using an Iron(II) Complex of Diethyl Thiophene-2,5-Dicarboxylate-Modified Carbon Paste Electrode

#### Contents

- Section S1. Cartesian coordinates of the optimized structures
- Table S1–S3. Conformer energy tables
- Table S4–S5. Benchmark energy tables

#### Section S1. Cartesian coordinates of the optimized structures

Coordinates are reproduced below in XYZ-style format using the charge and multiplicity reported in the uploaded input files. Each block begins with the atom count.

##### S1.1. Graphene nanoflake (G)

*Atoms: 180 | Charge: 0 | Multiplicity: 1*

Input header: !PBE def2-SVP RI D3BJ DEF2/J VERYSLOWCONV KDIIS TIGHTSCF PAL8 !KEEPDENS XYZFILE

```
180
C      -0.315422000      0.426741000     -9.924580000
C      -2.795645000      0.626749000     -9.892966000
C      -5.277857000      0.828182000     -9.866202000
C      -3.988963000      0.774960000     -7.746946000
C      -4.000597000      0.741186000     -9.194346000
C      -5.206347000      0.889293000     -7.020945000
C      -6.451443000      0.941193000     -9.166439000
C      -6.470685000      0.976700000     -7.721091000
C      -7.657801000      1.090585000     -6.992557000
C      -8.867555000      1.237509000     -4.822900000
C      4.646615000      0.020620000     -9.990698000
C      2.164722000      0.225504000     -9.955221000
C      0.948880000      0.377855000     -7.810206000
C      0.926542000      0.343806000     -9.254706000
C      -0.274615000      0.493634000     -7.083363000
C      -1.518525000      0.575996000     -7.779214000
C      -1.537554000      0.542507000     -9.223772000
C      -2.741319000      0.690657000     -7.051452000
C      -2.722101000      0.722643000     -5.619317000
C      -3.943426000      0.835522000     -4.890865000
C      -5.190744000      0.920164000     -5.590361000
C      -6.412097000      1.034485000     -4.860155000
C      -7.670239000      1.122327000     -5.565439000
C      -6.394474000      1.063937000     -3.432757000
C      -7.615388000      1.178756000     -2.701469000
C      -8.871824000      1.267677000     -3.409681000
C      -10.076617000     1.384203000     -2.652833000
C      -11.290609000     1.533843000     -0.483238000
C      5.839784000      -0.062046000     -9.320436000
C      4.656694000      0.092614000     -7.144678000
C      5.900339000      -0.030026000     -7.876162000
C      3.419210000      0.177035000     -7.839948000
C      3.389399000      0.142892000     -9.287106000
C      2.191976000      0.294830000     -7.113419000
C      2.213637000      0.327369000     -5.681310000
C      0.988391000      0.442077000     -4.951705000
C      -0.254214000      0.525115000     -5.649491000
C      -1.476595000      0.638738000     -4.920734000
C      -1.456651000      0.669665000     -3.491824000
C      -2.680143000      0.782359000     -2.762035000
C      -3.924228000      0.865991000     -3.460703000
C      -5.146336000      0.978531000     -2.731324000
C      -5.126443000      1.008836000     -1.304128000
C      -6.350610000      1.122786000     -0.572605000
C      -7.596566000      1.208853000     -1.274300000
C      -8.819033000      1.324701000     -0.539490000
C      -10.074230000     1.413757000     -1.255660000
C      -8.798809000      1.355507000      0.882105000
C      -10.033245000     1.475929000      1.629288000
```

|   |               |              |              |
|---|---------------|--------------|--------------|
| C | -11.271123000 | 1.563597000  | 0.887305000  |
| C | 7.107586000   | -0.114540000 | -7.177392000 |
| C | 5.923314000   | 0.040114000  | -5.014869000 |
| C | 7.160652000   | -0.082741000 | -5.751279000 |
| C | 4.681907000   | 0.126059000  | -5.714269000 |
| C | 3.455017000   | 0.243235000  | -4.983762000 |
| C | 3.476540000   | 0.275911000  | -3.553669000 |
| C | 2.252704000   | 0.390226000  | -2.824016000 |
| C | 1.009097000   | 0.473861000  | -3.522819000 |
| C | -0.213684000  | 0.586816000  | -2.793581000 |
| C | -0.193435000  | 0.617214000  | -1.364485000 |
| C | -1.415946000  | 0.729695000  | -0.635261000 |
| C | -2.660034000  | 0.812799000  | -1.334318000 |
| C | -3.882736000  | 0.924917000  | -0.604827000 |
| C | -3.862419000  | 0.956175000  | 0.823753000  |
| C | -5.085922000  | 1.070065000  | 1.554021000  |
| C | -6.330264000  | 1.154686000  | 0.853449000  |
| C | -7.556016000  | 1.269971000  | 1.586091000  |
| C | -7.534156000  | 1.303179000  | 3.013149000  |
| C | -8.770015000  | 1.423573000  | 3.752467000  |
| C | -9.995860000  | 1.507832000  | 3.025838000  |
| C | 8.378408000   | -0.169059000 | -5.038755000 |
| C | 7.187234000   | -0.013900000 | -2.887097000 |
| C | 8.422846000   | -0.137209000 | -3.626344000 |
| C | 5.946324000   | 0.073516000  | -3.587626000 |
| C | 4.718621000   | 0.190940000  | -2.855201000 |
| C | 4.739335000   | 0.223290000  | -1.428060000 |
| C | 3.515938000   | 0.338448000  | -0.697822000 |
| C | 2.273202000   | 0.422411000  | -1.396340000 |
| C | 1.049261000   | 0.534806000  | -0.666257000 |
| C | 1.069542000   | 0.565841000  | 0.761176000  |
| C | -0.152962000  | 0.678391000  | 1.490398000  |
| C | -1.395666000  | 0.760712000  | 0.792173000  |
| C | -2.619595000  | 0.873292000  | 1.522252000  |
| C | -2.599074000  | 0.905741000  | 2.949925000  |
| C | -3.822882000  | 1.020410000  | 3.679571000  |
| C | -5.065114000  | 1.103551000  | 2.981139000  |
| C | -6.292951000  | 1.219349000  | 3.713605000  |
| C | -6.269819000  | 1.254117000  | 5.140817000  |
| C | -7.507330000  | 1.374858000  | 5.877280000  |
| C | -8.725379000  | 1.457197000  | 5.164817000  |
| C | 9.648432000   | -0.224977000 | -2.899670000 |
| C | 8.451650000   | -0.069050000 | -0.756001000 |
| C | 9.685763000   | -0.193183000 | -1.503107000 |
| C | 7.209126000   | 0.019714000  | -1.460053000 |
| C | 5.983581000   | 0.137503000  | -0.727466000 |
| C | 6.003968000   | 0.169846000  | 0.698576000  |
| C | 4.779947000   | 0.285595000  | 1.430059000  |
| C | 3.536314000   | 0.370423000  | 0.730740000  |
| C | 2.313677000   | 0.483332000  | 1.460216000  |
| C | 2.333893000   | 0.515034000  | 2.887901000  |
| C | 1.110488000   | 0.628809000  | 3.617667000  |
| C | -0.132592000  | 0.710295000  | 2.919459000  |
| C | -1.355321000  | 0.823899000  | 3.648685000  |
| C | -1.334493000  | 0.857185000  | 5.077536000  |
| C | -2.559673000  | 0.972763000  | 5.807122000  |
| C | -3.801212000  | 1.054902000  | 5.109620000  |
| C | -5.028154000  | 1.171380000  | 5.840146000  |
| C | -5.002745000  | 1.207124000  | 7.270495000  |
| C | -6.246488000  | 1.328426000  | 8.002020000  |
| C | -7.454005000  | 1.409252000  | 7.303308000  |
| C | 10.923407000  | -0.283727000 | -0.761071000 |
| C | 10.943009000  | -0.252469000 | 0.609443000  |
| C | 8.472011000   | -0.036625000 | 0.665558000  |
| C | 9.727009000   | -0.128059000 | 1.381776000  |
| C | 7.249803000   | 0.082316000  | 1.400299000  |
| C | 7.268803000   | 0.114541000  | 2.827419000  |
| C | 6.048129000   | 0.232294000  | 3.558641000  |
| C | 4.800021000   | 0.318093000  | 2.857204000  |
| C | 3.578049000   | 0.432314000  | 3.586545000  |
| C | 3.597423000   | 0.464903000  | 5.016655000  |
| C | 2.376240000   | 0.579506000  | 5.745074000  |
| C | 1.130550000   | 0.661148000  | 5.046544000  |
| C | -0.091727000  | 0.776080000  | 5.775271000  |
| C | -0.071103000  | 0.810258000  | 7.209075000  |
| C | -1.294552000  | 0.926644000  | 7.935888000  |
| C | -2.537774000  | 1.008172000  | 7.239156000  |
| C | -3.765040000  | 1.125549000  | 7.965698000  |
| C | -3.735003000  | 1.162399000  | 9.412784000  |
| C | -4.992260000  | 1.284025000  | 10.116395000 |
| C | -6.185685000  | 1.363347000  | 9.446205000  |
| C | 9.729608000   | -0.095942000 | 2.778895000  |
| C | 8.525175000   | 0.024828000  | 3.535644000  |
| C | 8.521111000   | 0.057565000  | 4.948809000  |
| C | 6.065951000   | 0.264184000  | 4.985983000  |
| C | 7.324050000   | 0.175807000  | 5.691272000  |
| C | 4.844770000   | 0.380632000  | 5.716135000  |

|   |               |              |               |
|---|---------------|--------------|---------------|
| C | 4.860587000   | 0.414055000  | 7.146659000   |
| C | 3.643371000   | 0.530397000  | 7.872619000   |
| C | 2.395592000   | 0.613091000  | 7.177171000   |
| C | 1.172903000   | 0.729078000  | 7.904898000   |
| C | 1.192168000   | 0.765535000  | 9.349381000   |
| C | -0.029873000  | 0.882485000  | 10.050122000  |
| C | -1.271961000  | 0.963711000  | 9.380296000   |
| C | -2.510111000  | 1.082299000  | 10.080783000  |
| C | 7.311860000   | 0.210557000  | 7.118321000   |
| C | 6.124970000   | 0.327178000  | 7.846780000   |
| C | 6.105968000   | 0.365398000  | 9.292057000   |
| C | 3.655206000   | 0.566493000  | 9.319965000   |
| C | 4.932549000   | 0.480391000  | 9.991766000   |
| C | 2.450359000   | 0.682380000  | 10.018506000  |
| H | 11.862449000  | -0.382003000 | -1.327087000  |
| H | 11.897848000  | -0.325753000 | 1.152394000   |
| H | 10.687722000  | -0.167642000 | 3.316546000   |
| H | 9.479064000   | -0.013277000 | 5.486587000   |
| H | 8.269976000   | 0.141859000  | 7.656331000   |
| H | 7.066492000   | 0.299664000  | 9.825420000   |
| H | 4.943643000   | 0.509518000  | 11.092608000  |
| H | 2.467359000   | 0.711017000  | 11.119678000  |
| H | -0.013306000  | 0.912048000  | 11.151148000  |
| H | -2.493528000  | 1.112004000  | 11.181929000  |
| H | -4.970310000  | 1.313122000  | 11.217033000  |
| H | -7.130535000  | 1.457154000  | 10.002697000  |
| H | -8.396476000  | 1.503878000  | 7.864448000   |
| H | -9.667866000  | 1.551937000  | 5.725677000   |
| H | -10.938602000 | 1.602553000  | 3.586536000   |
| H | -12.210508000 | 1.658643000  | 1.453324000   |
| H | -12.245672000 | 1.604679000  | -1.026115000  |
| H | -11.034847000 | 1.454573000  | -3.190451000  |
| H | -9.825540000  | 1.307970000  | -5.360669000  |
| H | -8.615883000  | 1.159688000  | -7.530574000  |
| H | -7.411890000  | 1.007900000  | -9.699826000  |
| H | -5.288656000  | 0.800688000  | -10.967093000 |
| H | -2.812483000  | 0.600009000  | -10.994188000 |
| H | -0.331966000  | 0.399550000  | -11.025664000 |
| H | 2.148407000   | 0.197374000  | -11.056415000 |
| H | 4.624639000   | -0.006632000 | -11.091382000 |
| H | 6.784633000   | -0.156506000 | -9.876811000  |
| H | 8.049930000   | -0.210599000 | -7.738481000  |
| H | 9.320702000   | -0.265899000 | -5.599553000  |
| H | 10.590934000  | -0.322233000 | -3.460315000  |

## S1.2. Modifier (Fe-TDC)

Atoms: 28 | Charge: 0 | Multiplicity: 1

Input header: !PBE def2-SVP RI D3BJ DEF2/J VERYSLOWCONV KDIIS TIGHTSCF PAL8 !KEEPDENS XYZFILE

|    |              |              |              |
|----|--------------|--------------|--------------|
| 28 |              |              |              |
| C  | 0.014885000  | 0.023039000  | 0.024521000  |
| S  | 0.085095000  | 0.015613000  | 1.773779000  |
| C  | 1.834806000  | 0.022878000  | 1.796307000  |
| C  | 2.345671000  | 0.035023000  | 0.490030000  |
| C  | 1.308469000  | 0.033698000  | -0.517919000 |
| C  | 2.495650000  | 0.012470000  | 3.098490000  |
| O  | 3.844335000  | 0.025904000  | 2.975050000  |
| C  | 4.611212000  | -0.017245000 | 4.208103000  |
| C  | 4.781733000  | -1.438665000 | 4.707923000  |
| O  | 3.584736000  | 0.030965000  | 0.013712000  |
| Fe | 3.556852000  | -0.004523000 | -1.796366000 |
| O  | 1.746385000  | 0.028934000  | -1.770634000 |
| C  | -1.252907000 | 0.014135000  | -0.698931000 |
| O  | -2.313798000 | 0.026149000  | 0.149049000  |
| C  | -3.633131000 | -0.030988000 | -0.452899000 |
| C  | -4.041948000 | -1.458606000 | -0.761083000 |
| O  | 1.896639000  | -0.001354000 | 4.174862000  |
| O  | -1.346020000 | 0.001350000  | -1.925126000 |
| H  | -3.633313000 | 0.596339000  | -1.366526000 |
| H  | -4.299645000 | 0.430736000  | 0.300171000  |
| H  | -3.385636000 | -1.906260000 | -1.533594000 |
| H  | -5.081460000 | -1.468565000 | -1.146214000 |
| H  | -4.005460000 | -2.089576000 | 0.149599000  |
| H  | 4.110069000  | 0.621463000  | 4.962560000  |
| H  | 5.582986000  | 0.439221000  | 3.940476000  |
| H  | 3.809084000  | -1.879950000 | 5.000729000  |
| H  | 5.441484000  | -1.438918000 | 5.599048000  |
| H  | 5.247051000  | -2.079861000 | 3.932555000  |

## S1.3. Caffeic acid (CA)

Atoms: 21 | Charge: 0 | Multiplicity: 1

Input header: !PBE def2-SVP RI D3BJ DEF2/J VERYSLOWCONV KDIIS TIGHTSCF PAL8 !KEEPDENS XYZFILE

|    |              |              |              |
|----|--------------|--------------|--------------|
| 21 |              |              |              |
| C  | -4.348957000 | 0.157201000  | -1.834516000 |
| C  | -5.412413000 | -0.526344000 | -1.214680000 |
| C  | -3.226736000 | 0.554219000  | -1.103312000 |
| H  | -2.412657000 | 1.084921000  | -1.617377000 |
| C  | -5.340832000 | -0.816024000 | 0.176564000  |
| C  | -3.139011000 | 0.276004000  | 0.283357000  |
| C  | -4.215226000 | -0.415168000 | 0.900869000  |
| H  | -4.170823000 | -0.644784000 | 1.977548000  |
| H  | -4.421212000 | 0.373691000  | -2.912038000 |
| O  | -6.400366000 | -1.482109000 | 0.724052000  |
| H  | -6.217590000 | -1.624338000 | 1.674757000  |
| O  | -6.528174000 | -0.934093000 | -1.875172000 |
| H  | -6.454675000 | -0.658721000 | -2.811814000 |
| C  | -2.003049000 | 0.666103000  | 1.104593000  |
| H  | -2.070830000 | 0.383182000  | 2.168349000  |
| C  | -0.884660000 | 1.335963000  | 0.701853000  |
| H  | -0.736621000 | 1.656432000  | -0.340180000 |
| C  | 0.217287000  | 1.698566000  | 1.596082000  |
| O  | 1.228162000  | 2.304821000  | 1.229532000  |
| O  | 0.045219000  | 1.312963000  | 2.891102000  |
| H  | 0.842320000  | 1.616299000  | 3.379461000  |

### S1.4. Graphene-modifier complex (G-Fe-TDC)

Atoms: 208 | Charge: 0 | Multiplicity: 1

Input header: !PBE def2-SVP RI D3BJ DEF2/J VERYSLOWCONV KDIIS TIGHTSCF PAL8 !KEEPDENS XYZFILE

|     |               |              |              |
|-----|---------------|--------------|--------------|
| 208 |               |              |              |
| C   | 0.720351000   | 0.608662000  | -9.890733000 |
| C   | -1.753424000  | 0.380557000  | -9.903448000 |
| C   | -4.226960000  | 0.122503000  | -9.924016000 |
| C   | -2.996778000  | 0.386158000  | -7.782361000 |
| C   | -2.972461000  | 0.300180000  | -9.227563000 |
| C   | -4.228900000  | 0.293301000  | -7.078911000 |
| C   | -5.413191000  | 0.017462000  | -9.246446000 |
| C   | -5.466321000  | 0.084676000  | -7.803256000 |
| C   | -6.658129000  | -0.080538000 | -7.096902000 |
| C   | -7.874573000  | -0.351544000 | -4.951627000 |
| C   | 5.676003000   | 1.040843000  | -9.874777000 |
| C   | 3.196272000   | 0.825790000  | -9.879855000 |
| C   | 1.931424000   | 0.822588000  | -7.756194000 |
| C   | 1.943891000   | 0.752019000  | -9.199484000 |
| C   | 0.692954000   | 0.753483000  | -7.050776000 |
| C   | -0.532154000  | 0.613209000  | -7.768207000 |
| C   | -0.515751000  | 0.535837000  | -9.210666000 |
| C   | -1.771111000  | 0.544367000  | -7.063052000 |
| C   | -1.787764000  | 0.622452000  | -5.631668000 |
| C   | -3.023915000  | 0.550416000  | -4.927690000 |
| C   | -4.248067000  | 0.374940000  | -5.651602000 |
| C   | -5.476706000  | 0.214988000  | -4.942896000 |
| C   | -6.696407000  | -0.052746000 | -5.670662000 |
| C   | -5.494169000  | 0.257598000  | -3.517284000 |
| C   | -6.698414000  | -0.022719000 | -2.821949000 |
| C   | -7.889971000  | -0.383150000 | -3.540709000 |
| C   | -9.042840000  | -0.817090000 | -2.808715000 |
| C   | -10.168531000 | -1.430681000 | -0.674201000 |
| C   | 6.853256000   | 1.175223000  | -9.185576000 |
| C   | 5.621338000   | 1.164834000  | -7.030338000 |
| C   | 6.880367000   | 1.242005000  | -7.741453000 |
| C   | 4.399910000   | 1.030388000  | -7.745261000 |
| C   | 4.404010000   | 0.963502000  | -9.191808000 |
| C   | 3.157904000   | 0.958263000  | -7.039067000 |
| C   | 3.146347000   | 1.019931000  | -5.608165000 |
| C   | 1.905053000   | 0.949889000  | -4.899259000 |
| C   | 0.678796000   | 0.820094000  | -5.617398000 |
| C   | -0.558996000  | 0.755155000  | -4.910172000 |
| C   | -0.572560000  | 0.818323000  | -3.483060000 |
| C   | -1.813501000  | 0.754083000  | -2.775068000 |
| C   | -3.039365000  | 0.616695000  | -3.496660000 |
| C   | -4.272695000  | 0.501338000  | -2.788600000 |
| C   | -4.276871000  | 0.550337000  | -1.368518000 |
| C   | -5.515585000  | 0.345382000  | -0.654392000 |
| C   | -6.714643000  | -0.006487000 | -1.384606000 |
| C   | -7.861939000  | -0.505893000 | -0.680375000 |
| C   | -9.038043000  | -0.929004000 | -1.423325000 |
| C   | -7.838846000  | -0.607273000 | 0.758510000  |
| C   | -8.995778000  | -1.126745000 | 1.470264000  |
| C   | -10.146995000 | -1.527995000 | 0.692316000  |
| C   | 8.071716000   | 1.374860000  | -7.024047000 |
| C   | 6.839985000   | 1.353802000  | -4.882278000 |
| C   | 8.092471000   | 1.432972000  | -5.598127000 |
| C   | 5.613903000   | 1.223484000  | -5.600961000 |
| C   | 4.371648000   | 1.149236000  | -4.891138000 |
| C   | 4.361369000   | 1.202629000  | -3.461609000 |
| C   | 3.122389000   | 1.129791000  | -2.752808000 |

|   |              |              |              |
|---|--------------|--------------|--------------|
| C | 1.892985000  | 1.007081000  | -3.471282000 |
| C | 0.654067000  | 0.939392000  | -2.763691000 |
| C | 0.643038000  | 0.987714000  | -1.334129000 |
| C | -0.593416000 | 0.910617000  | -0.625914000 |
| C | -1.824818000 | 0.797765000  | -1.347013000 |
| C | -3.062060000 | 0.696382000  | -0.641114000 |
| C | -3.063926000 | 0.673830000  | 0.798351000  |
| C | -4.273646000 | 0.461689000  | 1.515169000  |
| C | -5.506908000 | 0.263306000  | 0.789077000  |
| C | -6.686376000 | -0.176126000 | 1.498730000  |
| C | -6.653864000 | -0.322411000 | 2.927283000  |
| C | -7.824544000 | -0.786318000 | 3.621671000  |
| C | -8.972756000 | -1.178027000 | 2.859748000  |
| C | 9.295166000  | 1.563411000  | -4.867674000 |
| C | 8.058438000  | 1.530310000  | -2.736870000 |
| C | 9.309291000  | 1.612961000  | -3.455499000 |
| C | 6.832059000  | 1.404492000  | -3.456065000 |
| C | 5.589026000  | 1.326711000  | -2.744160000 |
| C | 5.580056000  | 1.370710000  | -1.317937000 |
| C | 4.341589000  | 1.292406000  | -0.608488000 |
| C | 3.112461000  | 1.176168000  | -1.326012000 |
| C | 1.872862000  | 1.100920000  | -0.616685000 |
| C | 1.865531000  | 1.133927000  | 0.810196000  |
| C | 0.628842000  | 1.043474000  | 1.518948000  |
| C | -0.599651000 | 0.929979000  | 0.801452000  |
| C | -1.834119000 | 0.804614000  | 1.513731000  |
| C | -1.831701000 | 0.758589000  | 2.941477000  |
| C | -3.048303000 | 0.522649000  | 3.651580000  |
| C | -4.265748000 | 0.344182000  | 2.931258000  |
| C | -5.466360000 | -0.019531000 | 3.642099000  |
| C | -5.447531000 | -0.139203000 | 5.063859000  |
| C | -6.644431000 | -0.532611000 | 5.771064000  |
| C | -7.802973000 | -0.859634000 | 5.030927000  |
| C | 10.520359000 | 1.741300000  | -2.711109000 |
| C | 9.279911000  | 1.694805000  | -0.587827000 |
| C | 10.529238000 | 1.782410000  | -1.314633000 |
| C | 8.051036000  | 1.572508000  | -1.310372000 |
| C | 6.810879000  | 1.489727000  | -0.598306000 |
| C | 6.803509000  | 1.522271000  | 0.826995000  |
| C | 5.565338000  | 1.434808000  | 1.538152000  |
| C | 4.334370000  | 1.324932000  | 0.819798000  |
| C | 3.097920000  | 1.241015000  | 1.528884000  |
| C | 3.093864000  | 1.249159000  | 2.956555000  |
| C | 1.858689000  | 1.138570000  | 3.666878000  |
| C | 0.627381000  | 1.040117000  | 2.949610000  |
| C | -0.601188000 | 0.886385000  | 3.660109000  |
| C | -0.594654000 | 0.811000000  | 5.087580000  |
| C | -1.815275000 | 0.575808000  | 5.796626000  |
| C | -3.034426000 | 0.410479000  | 5.079193000  |
| C | -4.240474000 | 0.099428000  | 5.787155000  |
| C | -4.225801000 | -0.007968000 | 7.212676000  |
| C | -5.444469000 | -0.347254000 | 7.918956000  |
| C | -6.609760000 | -0.608668000 | 7.195771000  |
| C | 11.752321000 | 1.910592000  | -0.554189000 |
| C | 11.744959000 | 1.943560000  | 0.816243000  |
| C | 9.272401000  | 1.728121000  | 0.833482000  |
| C | 10.513818000 | 1.850984000  | 1.568776000  |
| C | 8.036074000  | 1.638144000  | 1.547754000  |
| C | 8.028714000  | 1.659561000  | 2.974743000  |
| C | 6.795446000  | 1.559682000  | 3.685925000  |
| C | 5.559971000  | 1.450206000  | 2.964983000  |
| C | 4.325837000  | 1.348284000  | 3.674336000  |
| C | 4.323216000  | 1.335630000  | 5.104904000  |
| C | 3.093737000  | 1.202169000  | 5.813778000  |
| C | 1.860155000  | 1.098541000  | 5.095530000  |
| C | 0.633687000  | 0.930075000  | 5.804794000  |
| C | 0.639705000  | 0.856523000  | 7.237991000  |
| C | -0.580334000 | 0.636167000  | 7.944205000  |
| C | -1.803766000 | 0.477209000  | 7.226789000  |
| C | -3.016318000 | 0.198214000  | 7.931261000  |
| C | -2.998818000 | 0.101827000  | 9.375778000  |
| C | -4.238065000 | -0.204095000 | 10.055290000 |
| C | -5.399809000 | -0.424017000 | 9.362257000  |
| C | 10.490208000 | 1.875303000  | 2.965471000  |
| C | 9.271677000  | 1.777410000  | 3.702209000  |
| C | 9.243052000  | 1.787944000  | 5.115039000  |
| C | 6.789363000  | 1.562413000  | 5.113078000  |
| C | 8.033883000  | 1.677479000  | 5.837987000  |
| C | 5.557699000  | 1.443001000  | 5.823865000  |
| C | 5.552314000  | 1.421596000  | 7.254356000  |
| C | 4.327658000  | 1.274906000  | 7.961058000  |
| C | 3.094355000  | 1.158750000  | 7.245455000  |
| C | 1.867585000  | 0.984266000  | 7.953521000  |
| C | 1.870607000  | 0.918611000  | 9.397219000  |
| C | 0.651173000  | 0.705503000  | 10.077751000 |
| C | -0.571207000 | 0.549074000  | 9.386382000  |
| C | -1.798936000 | 0.288594000  | 10.065596000 |

|    |               |              |               |
|----|---------------|--------------|---------------|
| C  | 7.999176000   | 1.668980000  | 7.264897000   |
| C  | 6.802936000   | 1.539784000  | 7.974742000   |
| C  | 6.762747000   | 1.511084000  | 9.419888000   |
| C  | 4.320186000   | 1.231419000  | 9.408584000   |
| C  | 5.582671000   | 1.361810000  | 10.101218000  |
| C  | 3.112212000   | 1.056368000  | 10.087699000  |
| H  | 12.701889000  | 1.983089000  | -1.106101000  |
| H  | 12.688525000  | 2.042915000  | 1.374218000   |
| H  | 11.437450000  | 1.970250000  | 3.518128000   |
| H  | 10.190692000  | 1.879649000  | 5.667303000   |
| H  | 8.947234000   | 1.760822000  | 7.816665000   |
| H  | 7.712724000   | 1.607281000  | 9.966958000   |
| H  | 5.576169000   | 1.334115000  | 11.201939000  |
| H  | 3.113265000   | 1.013263000  | 11.188262000  |
| H  | 0.655396000   | 0.643966000  | 11.177263000  |
| H  | -1.790744000  | 0.215691000  | 11.164471000  |
| H  | -4.224804000  | -0.270427000 | 11.154200000  |
| H  | -6.328910000  | -0.672259000 | 9.897018000   |
| H  | -7.527650000  | -0.893695000 | 7.732038000   |
| H  | -8.704211000  | -1.198474000 | 5.563750000   |
| H  | -9.862997000  | -1.539125000 | 3.396967000   |
| H  | -11.023173000 | -1.916588000 | 1.232906000   |
| H  | -11.061379000 | -1.741909000 | -1.236810000  |
| H  | -9.945987000  | -1.103706000 | -3.368284000  |
| H  | -8.790535000  | -0.610221000 | -5.503716000  |
| H  | -7.591922000  | -0.272778000 | -7.646639000  |
| H  | -6.356342000  | -0.131974000 | -9.793095000  |
| H  | -4.206139000  | 0.062630000  | -11.023174000 |
| H  | -1.740073000  | 0.315001000  | -11.002788000 |
| H  | 0.730660000   | 0.548933000  | -10.990321000 |
| H  | 3.205272000   | 0.770942000  | -10.979860000 |
| H  | 5.678792000   | 0.987850000  | -10.974576000 |
| H  | 7.810354000   | 1.233815000  | -9.725526000  |
| H  | 9.026104000   | 1.436108000  | -7.569123000  |
| H  | 10.248746000  | 1.627431000  | -5.413607000  |
| H  | 11.473417000  | 1.809358000  | -3.257715000  |
| C  | -2.751074000  | -2.753406000 | -1.899233000  |
| S  | -1.340442000  | -2.803284000 | -0.853088000  |
| C  | -2.319667000  | -2.691191000 | 0.600952000   |
| C  | -3.684931000  | -2.617148000 | 0.281281000   |
| C  | -3.931999000  | -2.639546000 | -1.148162000  |
| C  | -1.714205000  | -2.612288000 | 1.926369000   |
| O  | -0.359006000  | -2.550996000 | 1.852768000   |
| C  | 0.358370000   | -2.513289000 | 3.108247000   |
| O  | 1.829915000   | -2.362177000 | 2.797346000   |
| O  | -4.744993000  | -2.406853000 | 1.039957000   |
| Fe | -6.038822000  | -1.530824000 | -0.051280000  |
| O  | -5.183639000  | -2.414278000 | -1.506425000  |
| C  | -2.497834000  | -2.758561000 | -3.337194000  |
| O  | -3.629060000  | -2.897749000 | -4.068437000  |
| C  | -3.439680000  | -3.014691000 | -5.500509000  |
| C  | -4.786560000  | -3.281250000 | -6.130609000  |
| O  | -2.338888000  | -2.592130000 | 2.985546000   |
| O  | -1.374012000  | -2.668450000 | -3.835841000  |
| H  | -2.719990000  | -3.837040000 | -5.695140000  |
| H  | -2.977329000  | -2.081784000 | -5.880470000  |
| H  | -4.675758000  | -3.337974000 | -7.231439000  |
| H  | -5.508269000  | -2.474821000 | -5.896662000  |
| H  | -5.209507000  | -4.241954000 | -5.774451000  |
| H  | 0.146053000   | -3.447561000 | 3.670059000   |
| H  | -0.029982000  | -1.671795000 | 3.717581000   |
| H  | 2.016847000   | -1.456537000 | 2.188087000   |
| H  | 2.215703000   | -3.239760000 | 2.241149000   |
| H  | 2.404201000   | -2.269843000 | 3.739477000   |

## S1.5. Graphene–caffeic acid complex (G–CA)

Atoms: 201 | Charge: 0 | Multiplicity: 1

Input header: !PBE def2-SVP RI D3BJ DEF2/J VERYSLOWCONV KDIIS TIGHTSCF PAL8 !KEEPDENS XYZFILE

|     |              |              |               |
|-----|--------------|--------------|---------------|
| 201 |              |              |               |
| C   | -0.117830000 | -0.369736000 | -10.036162000 |
| C   | -2.599066000 | -0.209941000 | -10.002357000 |
| C   | -5.084724000 | -0.076023000 | -9.972015000  |
| C   | -3.783063000 | 0.058467000  | -7.863050000  |
| C   | -3.802219000 | -0.076661000 | -9.304590000  |
| C   | -4.999424000 | 0.178041000  | -7.137007000  |
| C   | -6.257661000 | 0.041347000  | -9.272167000  |
| C   | -6.269708000 | 0.167878000  | -7.831858000  |
| C   | -7.456864000 | 0.270695000  | -7.102484000  |
| C   | -8.660996000 | 0.464678000  | -4.935709000  |
| C   | 4.841979000  | -0.768287000 | -10.103380000 |
| C   | 2.361596000  | -0.556641000 | -10.067966000 |
| C   | 1.158340000  | -0.248912000 | -7.931617000  |
| C   | 1.127968000  | -0.390842000 | -9.369541000  |
| C   | -0.061348000 | -0.090419000 | -7.206678000  |

|   |               |              |              |
|---|---------------|--------------|--------------|
| C | -1.309717000  | -0.078387000 | -7.898756000 |
| C | -1.336621000  | -0.219274000 | -9.336876000 |
| C | -2.530123000  | 0.060902000  | -7.172038000 |
| C | -2.503219000  | 0.196338000  | -5.745837000 |
| C | -3.723429000  | 0.317294000  | -5.017115000 |
| C | -4.976706000  | 0.301782000  | -5.711561000 |
| C | -6.198048000  | 0.400496000  | -4.980244000 |
| C | -7.462458000  | 0.381376000  | -5.679619000 |
| C | -6.173865000  | 0.507409000  | -3.556682000 |
| C | -7.396676000  | 0.577586000  | -2.823431000 |
| C | -8.659502000  | 0.556015000  | -3.525620000 |
| C | -9.866504000  | 0.620754000  | -2.766837000 |
| C | -11.078915000 | 0.746765000  | -0.596383000 |
| C | 6.038254000   | -0.811044000 | -9.435184000 |
| C | 4.8677761000  | -0.496405000 | -7.268774000 |
| C | 6.106001000   | -0.680945000 | -7.996766000 |
| C | 3.627399000   | -0.451760000 | -7.961757000 |
| C | 3.589745000   | -0.590309000 | -9.402651000 |
| C | 2.405063000   | -0.278337000 | -7.237913000 |
| C | 2.434342000   | -0.142843000 | -5.811788000 |
| C | 1.213788000   | 0.026633000  | -5.084636000 |
| C | -0.033003000  | 0.049017000  | -5.779082000 |
| C | -1.252438000  | 0.197169000  | -5.051507000 |
| C | -1.224818000  | 0.337218000  | -3.628420000 |
| C | -2.446963000  | 0.467269000  | -2.899168000 |
| C | -3.697308000  | 0.446323000  | -3.592399000 |
| C | -4.919998000  | 0.535235000  | -2.861371000 |
| C | -4.893763000  | 0.633876000  | -1.438011000 |
| C | -6.120136000  | 0.682691000  | -0.703711000 |
| C | -7.372678000  | 0.658033000  | -1.398941000 |
| C | -8.597948000  | 0.708230000  | -0.661329000 |
| C | -9.859693000  | 0.692205000  | -1.371632000 |
| C | -8.574506000  | 0.767355000  | 0.758689000  |
| C | -9.812072000  | 0.811862000  | 1.509338000  |
| C | -11.056293000 | 0.803462000  | 0.773021000  |
| C | 7.315610000   | -0.734962000 | -7.299658000 |
| C | 6.143298000   | -0.428487000 | -5.145984000 |
| C | 7.374869000   | -0.616404000 | -5.878675000 |
| C | 4.899999000   | -0.368108000 | -5.843837000 |
| C | 3.678613000   | -0.187648000 | -5.116542000 |
| C | 3.707000000   | -0.063959000 | -3.691451000 |
| C | 2.488680000   | 0.115159000  | -2.964809000 |
| C | 1.241977000   | 0.162220000  | -3.661516000 |
| C | 0.023634000   | 0.327438000  | -2.934287000 |
| C | 0.050943000   | 0.454807000  | -1.510892000 |
| C | -1.169829000  | 0.588400000  | -0.782396000 |
| C | -2.419993000  | 0.590586000  | -1.476310000 |
| C | -3.644230000  | 0.667893000  | -0.745621000 |
| C | -3.619994000  | 0.735433000  | 0.681217000  |
| C | -4.846663000  | 0.761812000  | 1.415452000  |
| C | -6.096854000  | 0.744445000  | 0.720574000  |
| C | -7.325490000  | 0.778677000  | 1.456849000  |
| C | -7.302137000  | 0.820419000  | 2.883212000  |
| C | -8.541257000  | 0.858198000  | 3.626205000  |
| C | -9.772670000  | 0.857848000  | 2.904964000  |
| C | 8.594113000   | -0.684795000 | -5.167539000 |
| C | 7.414192000   | -0.392548000 | -3.023551000 |
| C | 8.644043000   | -0.580369000 | -3.759221000 |
| C | 6.172471000   | -0.314480000 | -3.723206000 |
| C | 4.950548000   | -0.130647000 | -2.994149000 |
| C | 4.976836000   | -0.027065000 | -1.570564000 |
| C | 3.759076000   | 0.153884000  | -0.843170000 |
| C | 2.515541000   | 0.231334000  | -1.541295000 |
| C | 1.296323000   | 0.404744000  | -0.814257000 |
| C | 1.321748000   | 0.490944000  | 0.610397000  |
| C | 0.099959000   | 0.610944000  | 1.338905000  |
| C | -1.145574000  | 0.660527000  | 0.642801000  |
| C | -2.372255000  | 0.727599000  | 1.375099000  |
| C | -2.351060000  | 0.739434000  | 2.803528000  |
| C | -3.577805000  | 0.772712000  | 3.537126000  |
| C | -4.824894000  | 0.787193000  | 2.842317000  |
| C | -6.055959000  | 0.816833000  | 3.578947000  |
| C | -6.032466000  | 0.839303000  | 5.005991000  |
| C | -7.273222000  | 0.878406000  | 5.746048000  |
| C | -8.495940000  | 0.890651000  | 5.037952000  |
| C | 9.870301000   | -0.662732000 | -3.033619000 |
| C | 8.683405000   | -0.391102000 | -0.896107000 |
| C | 9.912264000   | -0.574865000 | -1.639910000 |
| C | 7.441104000   | -0.296949000 | -1.599772000 |
| C | 6.221058000   | -0.115747000 | -0.870390000 |
| C | 6.245211000   | -0.036518000 | 0.553548000  |
| C | 5.026542000   | 0.137171000  | 1.282415000  |
| C | 3.784532000   | 0.241102000  | 0.582923000  |
| C | 2.566144000   | 0.406424000  | 1.309558000  |
| C | 2.588483000   | 0.451999000  | 2.736899000  |
| C | 1.364751000   | 0.555902000  | 3.466600000  |
| C | 0.121301000   | 0.630362000  | 2.768770000  |

|   |               |               |               |
|---|---------------|---------------|---------------|
| C | -1.104362000  | 0.692202000   | 3.500484000   |
| C | -1.084891000  | 0.688019000   | 4.930032000   |
| C | -2.312681000  | 0.738256000   | 5.662919000   |
| C | -3.556926000  | 0.778395000   | 4.967769000   |
| C | -4.786934000  | 0.817118000   | 5.701877000   |
| C | -4.762332000  | 0.827840000   | 7.132573000   |
| C | -6.009187000  | 0.873586000   | 7.867572000   |
| C | -7.220350000  | 0.899470000   | 7.171900000   |
| C | 11.149772000  | -0.669491000  | -0.898167000  |
| C | 11.172975000  | -0.596769000  | 0.470597000   |
| C | 8.707493000   | -0.315256000  | 0.523316000   |
| C | 9.961236000   | -0.421728000  | 1.239810000   |
| C | 7.489864000   | -0.142331000  | 1.255174000   |
| C | 7.511124000   | -0.086816000  | 2.681024000   |
| C | 6.293714000   | 0.070924000   | 3.409840000   |
| C | 5.048892000   | 0.190796000   | 2.708014000   |
| C | 3.830509000   | 0.340581000   | 3.435325000   |
| C | 3.848635000   | 0.345734000   | 4.865590000   |
| C | 2.627120000   | 0.452087000   | 5.594627000   |
| C | 1.382862000   | 0.550328000   | 4.895849000   |
| C | 0.159208000   | 0.622013000   | 5.626661000   |
| C | 0.178077000   | 0.615602000   | 7.061245000   |
| C | -1.047224000  | 0.681018000   | 7.790738000   |
| C | -2.292063000  | 0.738281000   | 7.095581000   |
| C | -3.521824000  | 0.789134000   | 7.825413000   |
| C | -3.492802000  | 0.794794000   | 9.273037000   |
| C | -4.752721000  | 0.849355000   | 9.980132000   |
| C | -5.949165000  | 0.886956000   | 9.312082000   |
| C | 9.966475000   | -0.362340000  | 2.635698000   |
| C | 8.765385000   | -0.201457000  | 3.389700000   |
| C | 8.763364000   | -0.159532000  | 4.802149000   |
| C | 6.312867000   | 0.099660000   | 4.836905000   |
| C | 7.568451000   | -0.016901000  | 5.542891000   |
| C | 5.093312000   | 0.229886000   | 5.566272000   |
| C | 5.108814000   | 0.240463000   | 6.997192000   |
| C | 3.891871000   | 0.350220000   | 7.723524000   |
| C | 2.645418000   | 0.448147000   | 7.027457000   |
| C | 1.421943000   | 0.536379000   | 7.536755000   |
| C | 1.439924000   | 0.535880000   | 9.201877000   |
| C | 0.216716000   | 0.613017000   | 9.904905000   |
| C | -1.025932000  | 0.680858000   | 9.235708000   |
| C | -2.265908000  | 0.743815000   | 9.939374000   |
| C | 7.557261000   | 0.008806000   | 6.969748000   |
| C | 6.371327000   | 0.131742000   | 7.697905000   |
| C | 6.352478000   | 0.150098000   | 9.143520000   |
| C | 3.902884000   | 0.356428000   | 9.171446000   |
| C | 5.178991000   | 0.257953000   | 9.843851000   |
| C | 2.697404000   | 0.450827000   | 9.871193000   |
| H | 12.084344000  | -0.809294000  | -1.462551000  |
| H | 12.126356000  | -0.6177579000 | 1.014811000   |
| H | 10.922359000  | -0.449957000  | 3.174663000   |
| H | 9.719174000   | -0.250449000  | 5.340408000   |
| H | 8.513968000   | -0.078760000  | 7.507199000   |
| H | 7.312447000   | 0.071378000   | 9.675870000   |
| H | 5.188305000   | 0.268499000   | 10.944937000  |
| H | 2.712482000   | 0.453744000   | 10.972623000  |
| H | 0.232188000   | 0.613394000   | 11.006208000  |
| H | -2.249153000  | 0.746709000   | 11.040781000  |
| H | -4.730136000  | 0.857998000   | 11.081013000  |
| H | -6.896880000  | 0.926199000   | 9.869979000   |
| H | -8.165732000  | 0.933487000   | 7.734806000   |
| H | -9.440870000  | 0.921392000   | 5.601556000   |
| H | -10.717346000 | 0.890705000   | 3.469147000   |
| H | -11.997363000 | 0.842300000   | 1.342699000   |
| H | -12.038228000 | 0.739097000   | -1.136125000  |
| H | -10.829145000 | 0.607100000   | -3.300688000  |
| H | -9.623866000  | 0.449839000   | -5.468833000  |
| H | -8.420072000  | 0.259720000   | -7.635354000  |
| H | -7.223007000  | 0.036316000   | -9.800603000  |
| H | -5.099892000  | -0.178648000  | -11.068171000 |
| H | -2.621130000  | -0.318438000  | -11.098154000 |
| H | -0.140813000  | -0.481192000  | -11.131500000 |
| H | 2.337964000   | -0.667520000  | -11.163485000 |
| H | 4.812695000   | -0.874655000  | -11.198834000 |
| H | 6.979430000   | -0.952140000  | -9.987602000  |
| H | 8.253738000   | -0.880346000  | -7.856827000  |
| H | 9.531603000   | -0.831995000  | -5.725050000  |
| C | 10.807735000  | -0.808244000  | -3.591937000  |
| C | -1.335505000  | -2.724270000  | -1.616957000  |
| C | -2.687410000  | -2.579411000  | -1.255048000  |
| C | -0.334329000  | -2.763095000  | -0.644022000  |
| C | 0.714075000   | -2.860030000  | -0.958678000  |
| C | -3.038868000  | -2.493706000  | 0.120586000   |
| C | -0.662033000  | -2.667402000  | 0.730555000   |
| C | -2.030515000  | -2.538012000  | 1.087448000   |
| H | -2.310636000  | -2.456410000  | 2.149806000   |
| H | -1.079385000  | -2.785452000  | -2.686352000  |

|   |              |              |              |
|---|--------------|--------------|--------------|
| O | -4.364913000 | -2.347138000 | 0.407243000  |
| H | -4.470535000 | -2.251063000 | 1.374638000  |
| O | -3.699844000 | -2.497039000 | -2.156522000 |
| H | -3.322913000 | -2.526485000 | -3.058779000 |
| C | 0.340950000  | -2.666178000 | 1.785392000  |
| H | -0.044778000 | -2.571880000 | 2.814185000  |
| C | 1.692290000  | -2.755680000 | 1.623142000  |
| H | 2.151937000  | -2.847201000 | 0.628350000  |
| C | 2.663000000  | -2.731269000 | -2.717541000 |
| O | 3.882745000  | -2.819727000 | 2.555447000  |
| O | 2.117177000  | -2.597829000 | 3.959281000  |
| H | 2.869668000  | -2.573007000 | 4.590439000  |

## S1.6. Graphene-modifier-caffeic acid complex (G-Fe-TDC-CA)

Atoms: 229 | Charge: 0 | Multiplicity: 1

Input header: !PBE def2-SVP RI D3BJ DEF2/J VERYSLOWCONV KDIIS TIGHTSCF PAL8 !KEEPDENS XYZFILE

```

229
C      0.331839115      2.304427217     -9.417554771
C     -2.143490127      2.215038067     -9.510827553
C     -4.617352491      2.020111393     -9.628033964
C     -3.432212416      1.856403003     -7.450212404
C     -3.378015140      2.041319230     -8.885044764
C     -4.677646417      1.628486891     -6.806699531
C     -5.818706557      1.804129287     -9.006471892
C     -5.900367602      1.586799895     -7.580062446
C     -7.113016427      1.330146283     -6.939042527
C     -8.407682434      0.803980053     -4.889560209
C      5.288101587      2.089428321     -9.302126925
C      2.809600456      2.257415110     -9.347148797
C      1.496362974      2.074497056     -7.260734669
C      1.540819155      2.224783395     -8.695521520
C      0.240633829      2.006931176     -6.589357439
C     -0.968856337      2.040831329     -7.342576693
C     -0.921282244      2.198800263     -8.777397411
C     -2.224797153      1.881799278     -6.685886777
C     -2.272253240      1.705219180     -5.265457564
C     -3.519597042      1.464064111     -4.622415129
C     -4.725659198      1.417724060     -5.394062452
C     -5.970649220      1.139655174     -4.757105556
C     -7.185838625      1.092915064     -5.535322615
C     -6.015095346      0.887834009     -3.354491095
C     -7.257325709      0.582125137     -2.723898084
C     -8.472308735      0.544276793     -3.504125487
C     -9.701521867      0.236472908     -2.849374477
C    -11.000952056     -0.357475107     -0.814420191
C      6.448784678      1.890098893     -8.602680546
C      5.169403426      1.735872301     -6.479148339
C      6.441438639      1.692544326     -7.171099451
C      3.966181365      1.938079924     -7.203783555
C      4.002557538      2.106033903     -8.641725890
C      2.709390161      1.950892363     -6.520437394
C      2.667588333      1.804647351     -5.097707317
C      1.403728909      1.792839290     -4.411545404
C      0.194601229      1.863795080     -5.161613408
C     -1.062200029      1.718072895     -4.500245565
C     -1.108013020      1.512513993     -3.087525406
C     -2.358695931      1.255779946     -2.444279238
C     -3.562670483      1.224882345     -3.212763140
C     -4.807717127      0.926822201     -2.581280053
C     -4.848944268      0.650603848     -1.183249325
C     -6.094600524      0.333296999     -0.554653958
C     -7.300337765      0.304828850     -1.326218200
C     -8.544692774     -0.011032816     -0.695469083
C     -9.759468892     -0.038087003     -1.482308026
C     -8.585692898     -0.301465929     0.693654005
C     -9.842833888     -0.623475047     1.335426943
C    -11.040680038     -0.635458795     0.526723983
C      7.610862679      1.456377283     -6.449711267
C      6.335300500      1.309042165     -4.335702133
C      7.596307659      1.251704223     -5.037509172
C      5.127008391      1.557164381     -5.061889426
C      3.876566256      1.616000954     -4.378661272
C      3.840410220      1.479037182     -2.946676414
C      2.577158291      1.515818175     -2.246239945
C      1.350968879      1.637505130     -2.996135437
C      0.105007817      1.491544286     -2.330128297
C      0.061022074      1.239899866     -0.913423962
C     -1.191221909      0.979715055     -0.276532155
C     -2.400029437      0.983474859     -1.042892997
C     -3.643541467      0.674869800     -0.414480197
C     -3.683111225      0.362800218     0.979871162
C     -4.928592323      0.043940762     1.605884143
C     -6.135226520      0.035418892     0.837882852
C     -7.382021565     -0.284151249     1.465632063

```

|   |              |              |              |
|---|--------------|--------------|--------------|
| C | -7.421345785 | -0.591302129 | 2.857503169  |
| C | -8.679307529 | -0.910868036 | 3.491386074  |
| C | -9.866160551 | -0.913956844 | 2.700383035  |
| C | 8.774931445  | 0.993036033  | -4.308188091 |
| C | 7.499601575  | 0.851490115  | -2.208183104 |
| C | 8.757605653  | 0.788874159  | -2.910812485 |
| C | 6.302758745  | 1.115343183  | -2.929478154 |
| C | 5.048183206  | 1.208711217  | -2.223432405 |
| C | 5.016902481  | 1.031427843  | -0.792826055 |
| C | 3.760683318  | 1.058451337  | -0.099979045 |
| C | 2.533649338  | 1.309562876  | -0.824271884 |
| C | 1.263331835  | 1.159890912  | -0.158173196 |
| C | 1.234748855  | 0.838757052  | 1.228020895  |
| C | -0.017304096 | 0.602673090  | 1.870482293  |
| C | -1.228935313 | 0.661078912  | 1.114684887  |
| C | -2.477394092 | 0.352264828  | 1.743355396  |
| C | -2.515777435 | 0.012790214  | 3.129494983  |
| C | -3.762364514 | -0.295214229 | 3.756816090  |
| C | -4.968390156 | -0.276482942 | 2.995043215  |
| C | -6.218702643 | -0.591963071 | 3.623642285  |
| C | -6.257222513 | -0.914134118 | 5.012388599  |
| C | -7.517306787 | -1.227122352 | 5.644699319  |
| C | -8.697476830 | -1.215643968 | 4.869561543  |
| C | 9.949747801  | 0.524500910  | -2.172988055 |
| C | 8.672273705  | 0.375127931  | -0.079704148 |
| C | 9.931128700  | 0.319447901  | -0.793719835 |
| C | 7.465650621  | 0.648470205  | -0.791477182 |
| C | 6.226188385  | 0.712648293  | -0.084901198 |
| C | 6.181313625  | 0.473770274  | 1.312091285  |
| C | 4.924776426  | 0.484434783  | 2.006103013  |
| C | 3.716124476  | 0.754553839  | 1.305296120  |
| C | 2.458783987  | 0.663326857  | 1.964523969  |
| C | 2.415285088  | 0.322731975  | 3.349286107  |
| C | 1.157154007  | 0.131656124  | 4.001534109  |
| C | -0.055968961 | 0.247817939  | 3.257503488  |
| C | -1.305017243 | -0.035280776 | 3.887652519  |
| C | -1.344049357 | -0.395785952 | 5.270389496  |
| C | -2.595521271 | -0.683487981 | 5.901569364  |
| C | -3.801978193 | -0.633826283 | 5.146114336  |
| C | -5.052398632 | -0.937452314 | 5.774684301  |
| C | -5.089482315 | -1.274120171 | 7.163817443  |
| C | -6.357350257 | -1.575833226 | 7.793549482  |
| C | -7.528611601 | -1.545780191 | 7.034697665  |
| C | 11.135142940 | 0.050693064  | -0.040558790 |
| C | 11.100488709 | -0.156406274 | 1.313097251  |
| C | 8.636580699  | 0.155414066  | 1.324848161  |
| C | 9.857796904  | -0.119861822 | 2.050692017  |
| C | 7.391845741  | 0.192070174  | 2.024398258  |
| C | 7.351067342  | -0.066007983 | 3.426055438  |
| C | 6.102147650  | -0.080050230 | 4.114218171  |
| C | 4.885487132  | 0.185077097  | 3.400968203  |
| C | 3.631674138  | 0.110900205  | 4.073694306  |
| C | 3.589416159  | -0.238937816 | 5.461273255  |
| C | 2.335602107  | -0.405332839 | 6.115143714  |
| C | 1.118438870  | -0.241394256 | 5.380282677  |
| C | -0.133245773 | -0.488823780 | 6.018441334  |
| C | -0.172972167 | -0.859651087 | 7.403610409  |
| C | -1.424096941 | -1.118137239 | 8.037493844  |
| C | -2.634708434 | -1.036364008 | 7.288730791  |
| C | -3.886733338 | -1.322486972 | 7.917516661  |
| C | -3.919164495 | -1.673536279 | 9.321328651  |
| C | -5.200820150 | -1.954747949 | 9.927364662  |
| C | -6.361177267 | -1.908713232 | 9.200013708  |
| C | 9.804916751  | -0.348034056 | 3.426581440  |
| C | 8.572936552  | -0.337580159 | 4.144508277  |
| C | 8.512661675  | -0.600995069 | 5.530705543  |
| C | 6.059626670  | -0.384247242 | 5.505617250  |
| C | 7.285909747  | -0.637996200 | 6.226401643  |
| C | 4.805985130  | -0.468005947 | 6.180220344  |
| C | 4.761732153  | -0.813642300 | 7.567020344  |
| C | 3.512082196  | -0.961493894 | 8.223773761  |
| C | 2.294123077  | -0.777957232 | 7.496955689  |
| C | 1.039969822  | -0.988961898 | 8.141770867  |
| C | 0.998275947  | -1.359962246 | 9.536639761  |
| C | -0.251558164 | -1.585902939 | 10.152184029 |
| C | -1.462950193 | -1.482178378 | 9.434501673  |
| C | -2.726233343 | -1.741677905 | 10.042983012 |
| C | 7.215550340  | -0.940485028 | 7.618661693  |
| C | 5.996469366  | -1.035056940 | 8.290412523  |
| C | 5.917222427  | -1.369155113 | 9.694435654  |
| C | 3.462586131  | -1.324471916 | 9.624416508  |
| C | 4.711166621  | -1.505284902 | 10.329861640 |
| C | 2.226822315  | -1.504669998 | 10.246725778 |
| H | 12.089517813 | 0.014883110  | -0.587423260 |
| H | 12.026841001 | -0.361407952 | 1.870853246  |
| H | 10.736108898 | -0.555737184 | 3.975649404  |
| H | 9.445962593  | -0.801627860 | 6.078568570  |

|    |               |              |               |
|----|---------------|--------------|---------------|
| H  | 8.151711461   | -1.120861973 | 8.168953644   |
| H  | 6.858862649   | -1.522122264 | 10.243340631  |
| H  | 4.668619183   | -1.768728916 | 11.397615914  |
| H  | 2.193524365   | -1.784307895 | 11.310870004  |
| H  | -0.281593206  | -1.867394014 | 11.215791669  |
| H  | -2.754464420  | -2.014723311 | 11.108974067  |
| H  | -5.221309364  | -2.215166127 | 10.996518609  |
| H  | -7.328333358  | -2.130618949 | 9.676263707   |
| H  | -8.490430410  | -1.779532070 | 7.516565410   |
| H  | -9.657055632  | -1.456570961 | 5.352089171   |
| H  | -10.824335974 | -1.157729223 | 3.184552171   |
| H  | -11.994635803 | -0.878368086 | 1.019154106   |
| H  | -11.922613721 | -0.373809221 | -1.415795208  |
| H  | -10.626825858 | 0.211643912  | -3.445149212  |
| H  | -9.333072682  | 0.771703945  | -5.484578221  |
| H  | -8.040724471  | 1.297488109  | -7.530664809  |
| H  | -6.753315601  | 1.782620878  | -9.587307953  |
| H  | -4.570046161  | 2.174487214  | -10.716705026 |
| H  | -2.103719282  | 2.346401027  | -10.602967902 |
| H  | 0.367534767   | 2.421577005  | -10.511321811 |
| H  | 2.840225002   | 2.379766182  | -10.440666594 |
| H  | 5.310510656   | 2.230635037  | -10.393385665 |
| H  | 7.418463356   | 1.869495906  | -9.122807806  |
| H  | 8.575118879   | 1.419577238  | -6.979146754  |
| H  | 9.735698779   | 0.946874314  | -4.843127551  |
| H  | 10.907532692  | 0.482106933  | -2.713630458  |
| C  | 0.308077998   | -2.291181381 | -0.322747850  |
| S  | -1.052769032  | -2.376023311 | -1.436002371  |
| C  | -0.058911186  | -1.804729903 | -2.771473236  |
| C  | 1.258750218   | -1.547628078 | -2.364202020  |
| C  | 1.469331012   | -1.820558124 | -0.955396185  |
| C  | -0.592938874  | -1.660087240 | -4.111493437  |
| O  | -1.930762990  | -1.902092167 | -4.157751466  |
| C  | -2.558979995  | -1.883446077 | -5.461398670  |
| C  | -4.022826085  | -2.207189310 | -5.266134381  |
| O  | 2.287650181   | -1.084558826 | -3.040583151  |
| Fe | 3.535218355   | -0.301182819 | -1.739148966  |
| O  | 2.661014364   | -1.539815305 | -0.472113950  |
| C  | 0.055553028   | -2.667776191 | 1.056811946   |
| O  | 1.191847926   | -2.748303210 | 1.797480175   |
| C  | 1.032716919   | -3.238307055 | 3.153322247   |
| C  | 2.409574207   | -3.389754408 | 3.757727333   |
| O  | 0.070359936   | -1.354726037 | -5.108507296  |
| O  | -1.065080870  | -2.916035464 | 1.518230165   |
| H  | 0.487429927   | -4.204215346 | 3.116637034   |
| H  | 0.403780233   | -2.525417457 | 3.724339424   |
| H  | 2.954890304   | -2.426753417 | 3.757734213   |
| H  | 3.012272168   | -4.134564507 | 3.200366104   |
| H  | 2.317991088   | -3.732779272 | 4.807092168   |
| H  | -2.051143406  | -2.627027955 | -6.111180705  |
| H  | -2.412062398  | -0.884500192 | -5.919781528  |
| H  | -4.503204195  | -1.482775290 | -4.578375411  |
| H  | -4.148686131  | -3.228056362 | -4.853475613  |
| H  | -4.549198165  | -2.155191295 | -6.239485550  |
| C  | 0.212048203   | -4.702416146 | -5.186591632  |
| C  | -0.912833930  | -5.163472408 | -4.476510378  |
| C  | 1.436442117   | -4.513778215 | -4.544774243  |
| H  | 2.288017430   | -4.116532263 | -5.114750529  |
| C  | -0.783876080  | -5.496398453 | -3.100581267  |
| C  | 1.572366056   | -4.808221433 | -3.165307053  |
| C  | 0.453717102   | -5.336847279 | -2.471041319  |
| H  | 0.534077960   | -5.564247443 | -1.396349003  |
| H  | 0.095168824   | -4.463894263 | -6.255120621  |
| O  | -1.911598307  | -5.930066617 | -2.464104335  |
| H  | -1.704620151  | -6.060343705 | -1.516216117  |
| O  | -2.147211302  | -5.303390577 | -5.033289513  |
| H  | -2.114812425  | -4.992026387 | -5.961780209  |
| C  | 2.755851394   | -4.455402556 | -2.399407124  |
| H  | 2.817406350   | -4.861467247 | -1.375579325  |
| C  | 3.687044070   | -3.533222298 | -2.789207024  |
| H  | 3.580140211   | -2.986734074 | -3.734196409  |
| C  | 4.646903336   | -2.962002975 | -1.867655957  |
| O  | 4.970511628   | -1.741242392 | -1.876420191  |
| O  | 5.199250611   | -3.787660245 | -0.975277903  |
| H  | 5.727843648   | -3.243231049 | -0.345503001  |

## Section S2. Conformer energy tables

Table S1. Relative energies of the tested conformations for the graphene–Fe–TDC adsorption system.

| System            | Conformer label | Electronic energy (Eh) | Relative energy (kcal mol <sup>-1</sup> ) | Selected for discussion? |
|-------------------|-----------------|------------------------|-------------------------------------------|--------------------------|
| Graphene–Fe–TDC-1 | Conf. 1         | -8223.1418             | 1.76                                      |                          |
| Graphene–Fe–TDC-2 | Conf. 2         | -8223.1392             | 3.39                                      |                          |
| Graphene–Fe–TDC-3 | Conf. 3         | -8223.1446             | 0.00                                      | Yes                      |
| Graphene–Fe–TDC-4 | Conf. 4         | -8223.1373             | 4.58                                      |                          |

Table S2. Relative energies of the tested conformations for the graphene–caffeic acid adsorption system.

| System        | Conformer label | Electronic energy (Eh) | Relative energy (kcal mol <sup>-1</sup> ) | Selected for discussion? |
|---------------|-----------------|------------------------|-------------------------------------------|--------------------------|
| Graphene–CA-1 | Conf. 1         | -6372.4377             | 0.00                                      | Yes                      |
| Graphene–CA-2 | Conf. 2         | -6372.4365             | 0.75                                      |                          |
| Graphene–CA-3 | Conf. 3         | -6372.4289             | 5.52                                      |                          |
| Graphene–CA-4 | Conf. 4         | -6372.4312             | 4.08                                      |                          |

Table S3. Relative energies of the tested conformations for the graphene–Fe–TDC–caffeic acid adsorption system.

| System               | Conformer label | Electronic energy (Eh) | Relative energy (kcal mol <sup>-1</sup> ) | Selected for discussion? |
|----------------------|-----------------|------------------------|-------------------------------------------|--------------------------|
| Graphene–Fe–TDC–CA-1 | Conf. 1         | -8870.6986             | 1.00                                      |                          |
| Graphene–Fe–TDC–CA-2 | Conf. 2         | -8870.7002             | 0.00                                      | Yes                      |
| Graphene–Fe–TDC–CA-3 | Conf. 3         | -8870.6852             | 9.41                                      |                          |
| Graphene–Fe–TDC–CA-4 | Conf. 4         | -8870.6711             | 18.26                                     |                          |

## Section S3. Benchmark single-point energy tables

Table S4. Absolute electronic energies used for the benchmark single-point analysis.

| System                                               | Original level (Eh) | Larger basis (Eh) | Alternative functional (Eh) | Solvation test (Eh) |
|------------------------------------------------------|---------------------|-------------------|-----------------------------|---------------------|
| Graphene nanoflake (G)                               | -5724.8908          | -5730.655         | -5725.253                   | -5724.85729         |
| Modifier (Fe-TDC)                                    | -2498.0993          | -2499.369         | -2498.131                   | -2498.07611         |
| Caffeic acid (CA)                                    | -647.5084           | -648.2369         | -647.5244                   | -647.484023         |
| Graphene–modifier complex (G–Fe–TDC)                 | -8223.1446          | -8230.153         | -8223.507                   | -8223.08917         |
| Graphene–caffeic acid complex (G–CA)                 | -6372.437           | -6378.923         | -6372.823                   | -6372.38571         |
| Graphene–modifier–caffeic acid complex (G–Fe–TDC–CA) | -8870.7002          | -8878.419         | -8871.088                   | -8870.61992         |

Note: Original level: PBE-D3BJ/def2-SVP/SMD(water), using the optimized geometries reported in the main manuscript. Larger basis: PBE-D3BJ/def2-TZVP/SMD(water). Alternative functional: PBE0-D3BJ/def2-SVP/SMD(water). Solvation test: PBE-D3BJ/def2-SVP in gas phase.

Table S5. Adsorption energies (without BSSE correction) derived from the benchmark single-point calculations.

| Adsorption process                | Original value (kcal mol <sup>-1</sup> ) | Larger basis | Alternative functional | Solvation test |
|-----------------------------------|------------------------------------------|--------------|------------------------|----------------|
| Fe-TDC on graphene                | 96.97                                    | 81.26        | 77.43                  | 97.74          |
| Caffeic acid on graphene          | 23.52                                    | 19.65        | 28.58                  | 27.86          |
| Caffeic acid on modified graphene | 29.55                                    | 18.55        | 35.18                  | 29.32          |

Note: The benchmark adsorption energies are fixed-geometry, non-BSSE-corrected values and are provided only to evaluate methodological sensitivity. The BSSE-corrected values discussed in the main text remain the primary adsorption-energy dataset.

End of Supplementary Information
